# Supplementary material
Source: PubMed Central journal article supplement (PMC5004940)
Supplement: JCI85939.sd.pdf [file JCI85939.sd.pdf]

## Supplemental Material

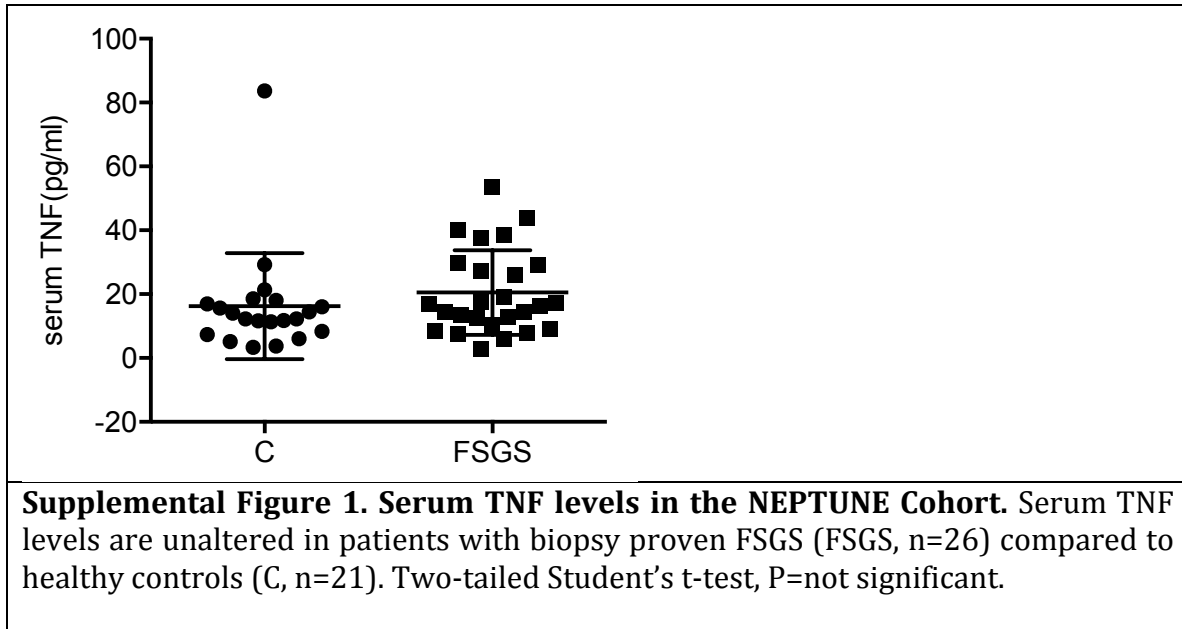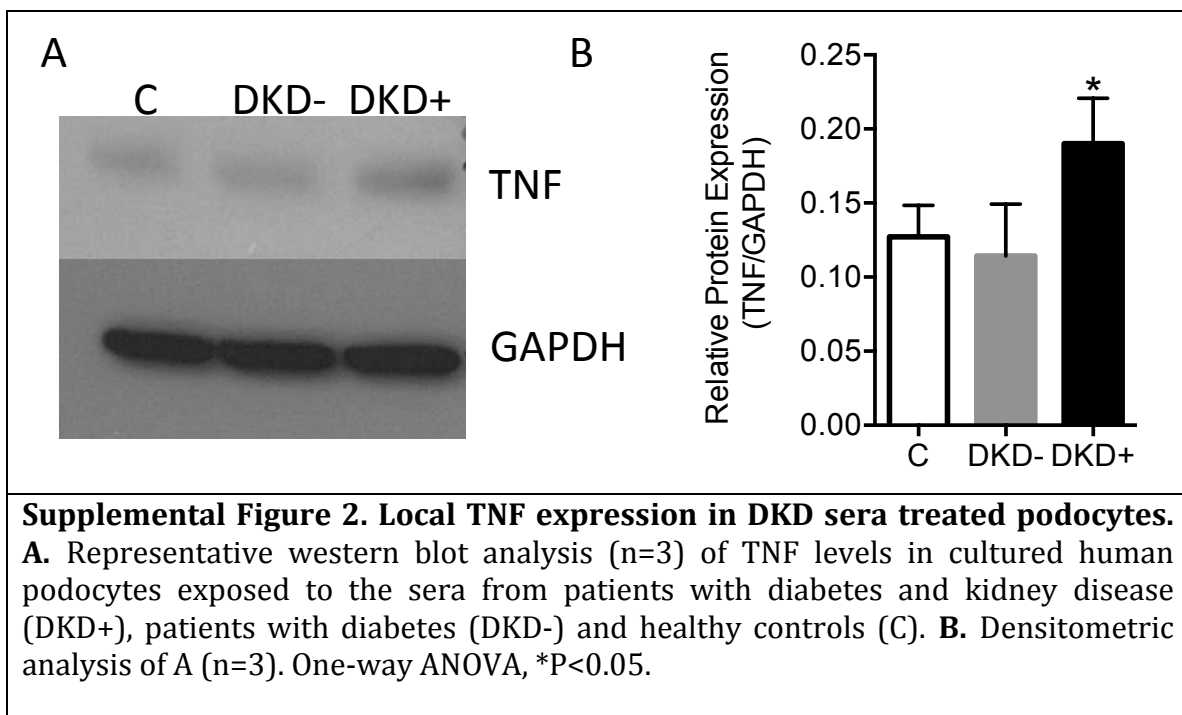

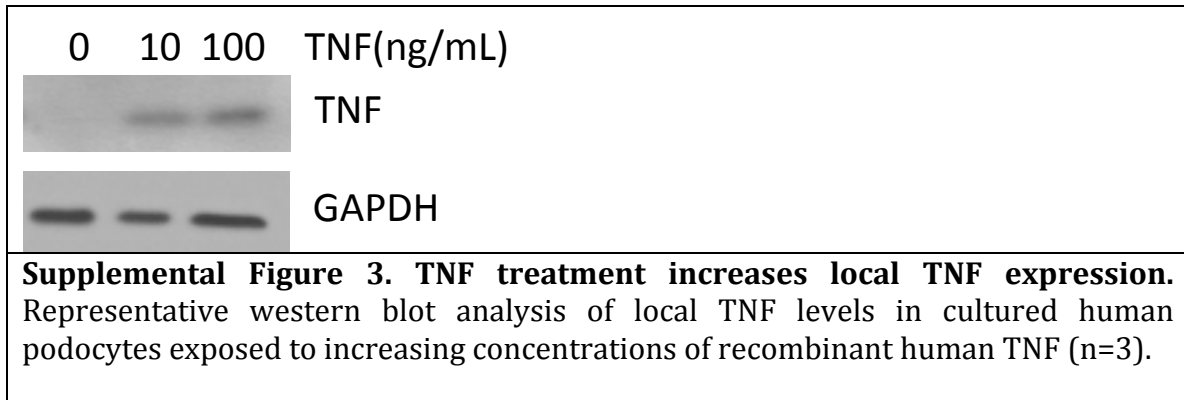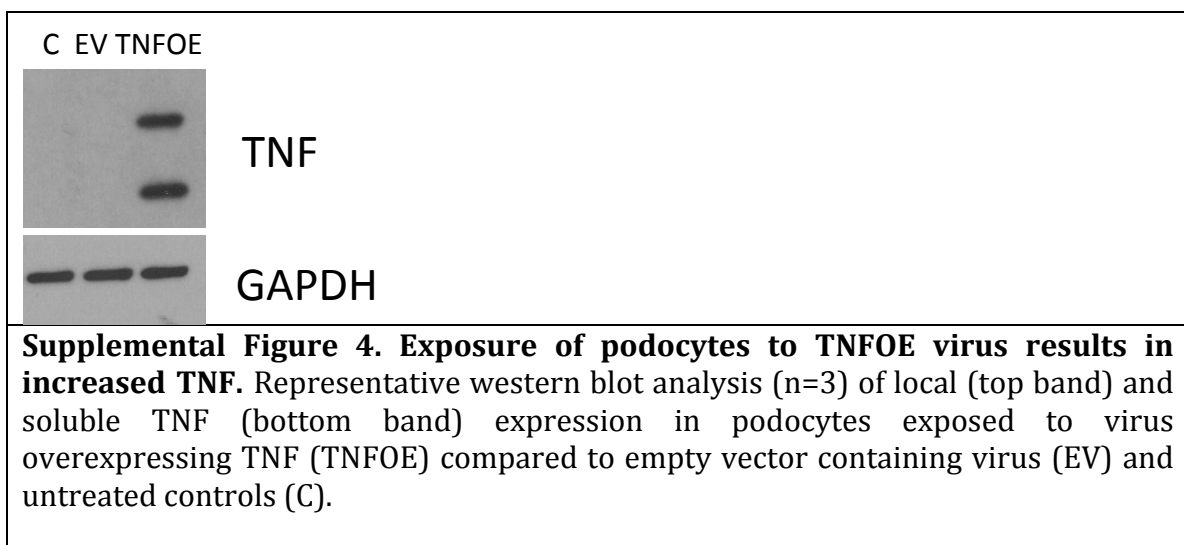

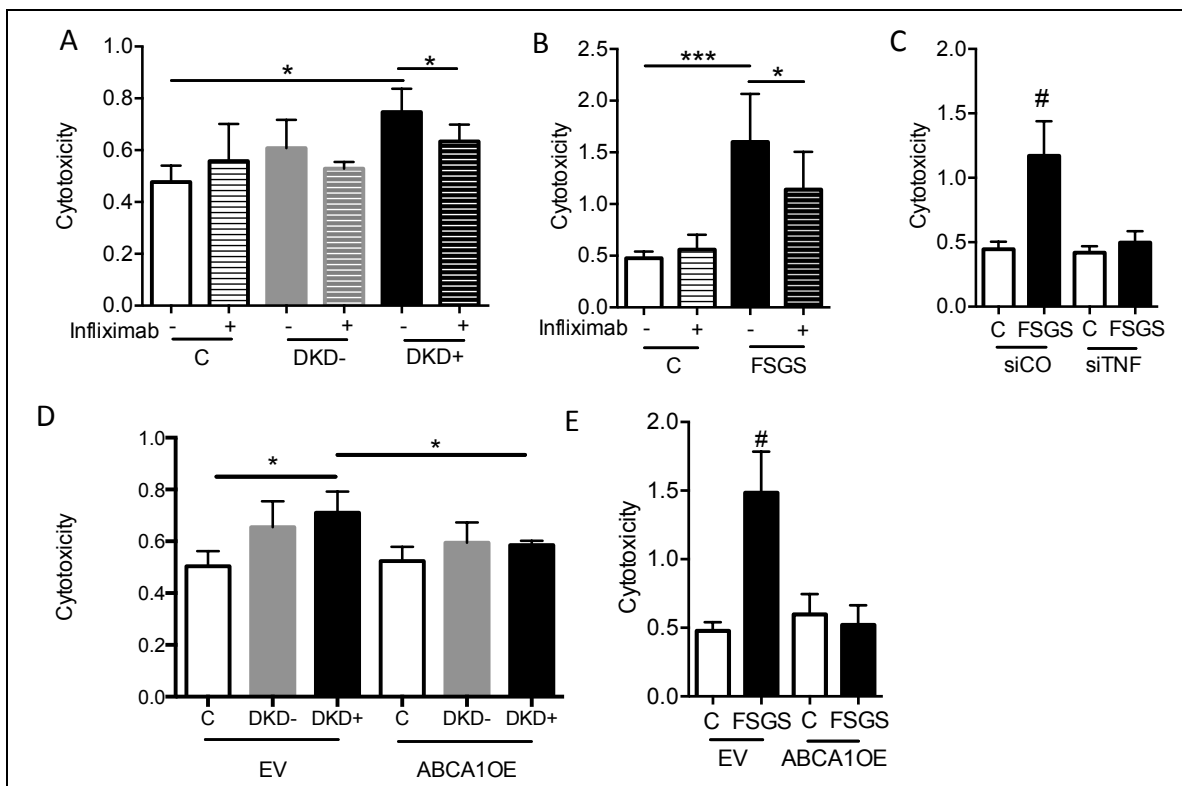

**Supplemental Figure 5. Cytotoxicity in DKD and FSGS sera treated podocytes.**

**A.** Treatment of human podocytes with Infliximab prevents DKD+ sera induced cytotoxicity (n=4) compared to DKD+ sera treatment alone and untreated healthy controls (C). Two-tailed Student's t-test, \*P<0.05 DKD+ versus C, DKD++Infl. **B.** Treatment of human podocytes with Infliximab prevents individual FSGS sera (n=6) induced cytotoxicity (n=4) compared to healthy controls (C). One-way ANOVA, \*\*\*P<0.01, \*P<0.05. **C.** Treatment of TNF knockdown human podocytes (siTNF) protects from individual FSGS sera (n=6) induced cytotoxicity (n=4) compared to scramble sequence treated controls (siCO). One-way ANOVA, ##P<0.001 compared to all groups. **D.** Cytotoxicity analysis was performed (n=4) in ABCA1 overexpressing (ABCA1OE) and empty vector (EV) podocytes treated with individual pooled serum from patients with diabetes and kidney disease (DKD+), patients with diabetes (DKD-) and healthy controls (C). One-way ANOVA, \*P<0.05. **E.** Cytotoxicity analysis was performed (n=4) in ABCA1 overexpressing (ABCA1OE) and empty vector (EV) podocytes treated with individual FSGS patient sera (n=6) and healthy controls (n=6). One-way ANOVA, #P<0.05 FSGS treated EV vs all conditions.

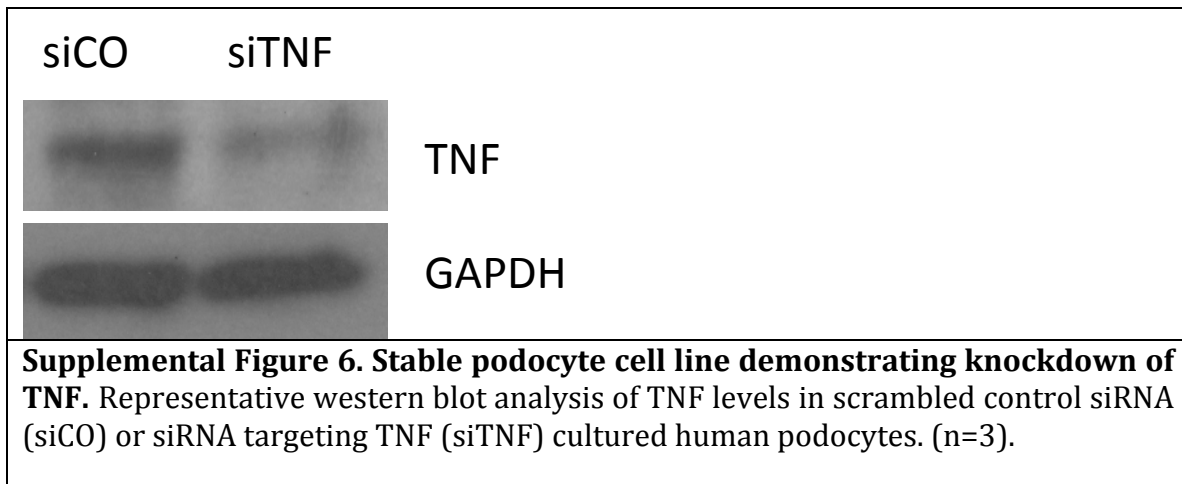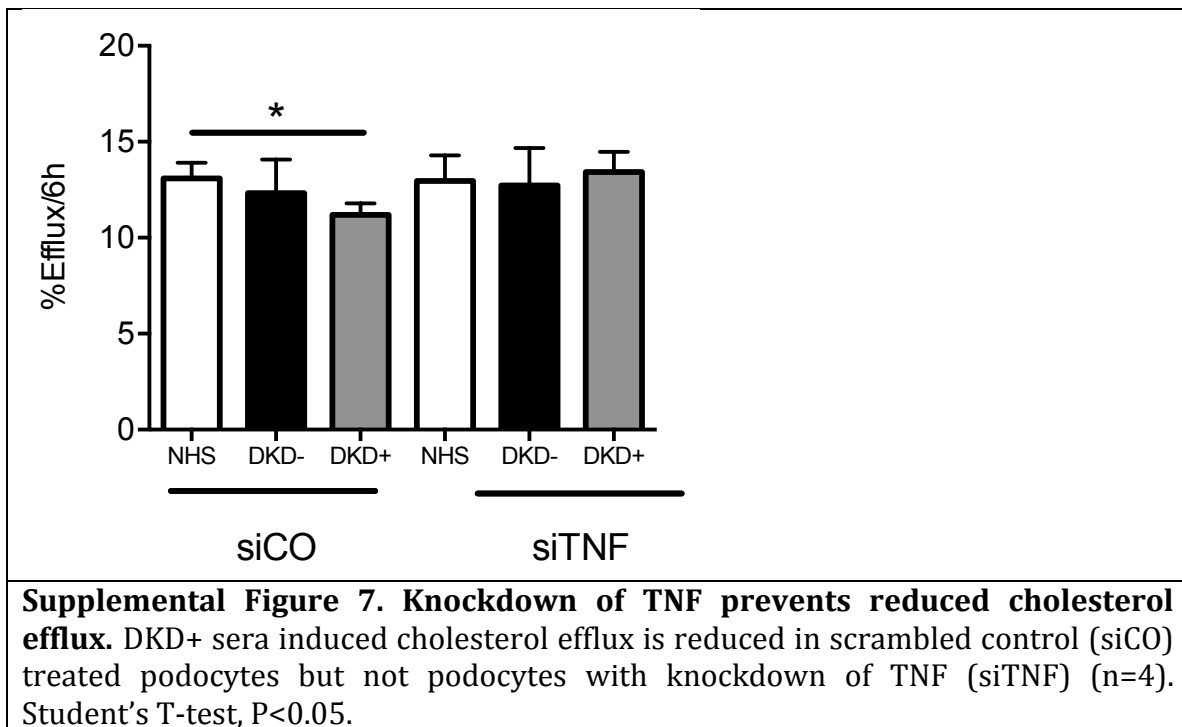

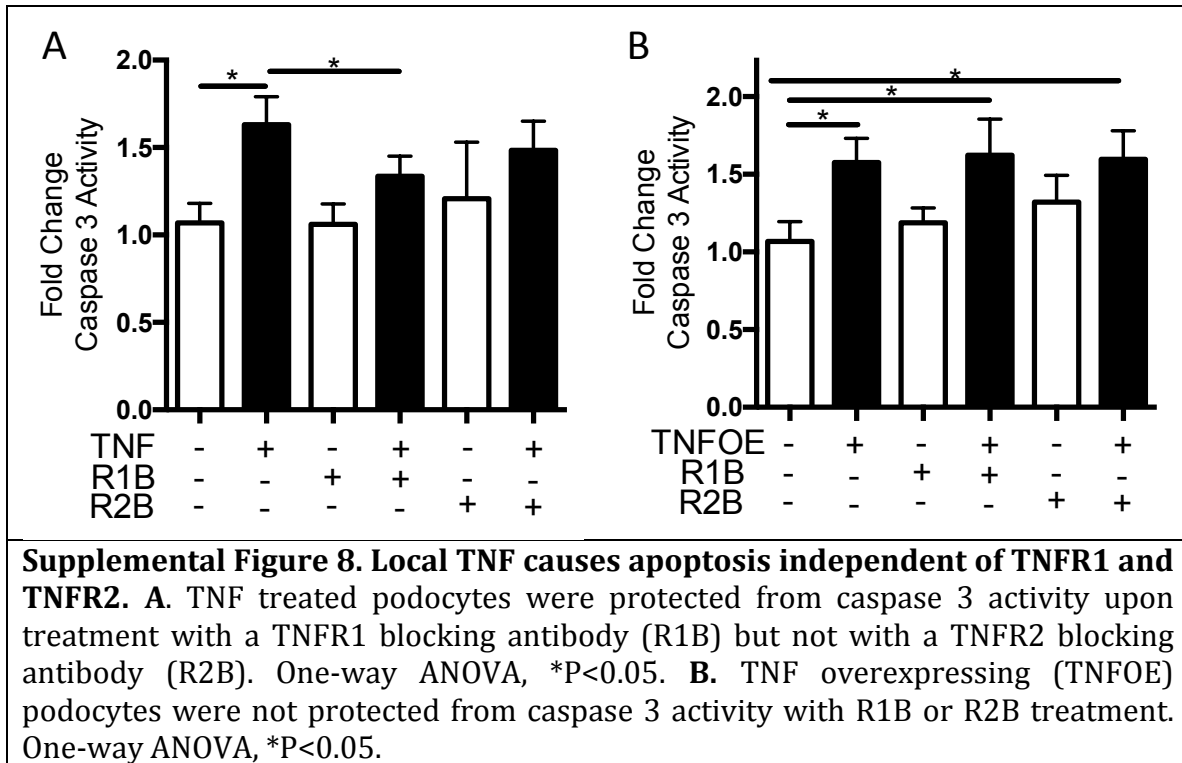

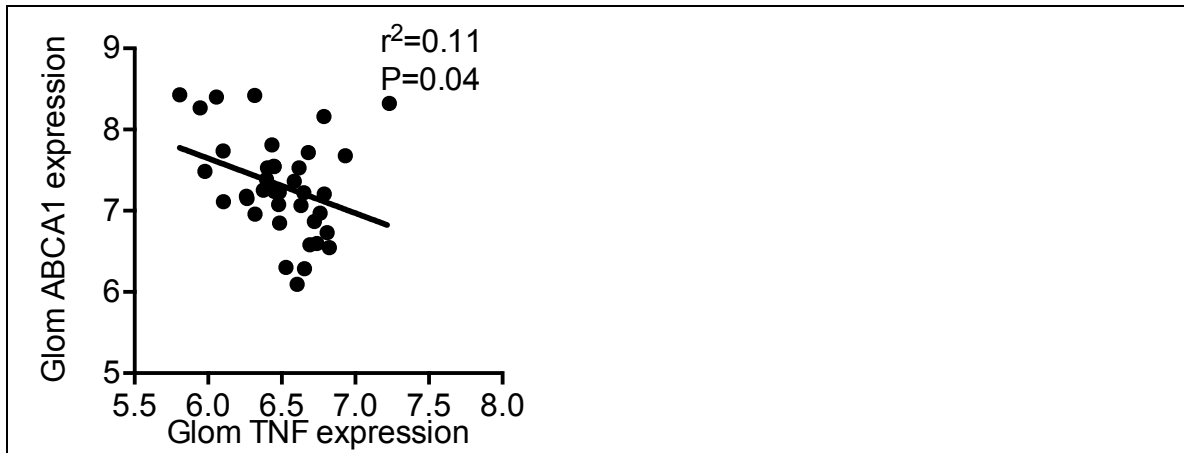

**Supplemental Figure 9. Increased glomerular TNF expression correlated to reduced ABCA1 expression.** Patients from the ERCB with higher glomerular *TNF* expression have reduced *ABCA1* expression (n=38). Correlation,  $P=0.04$ .

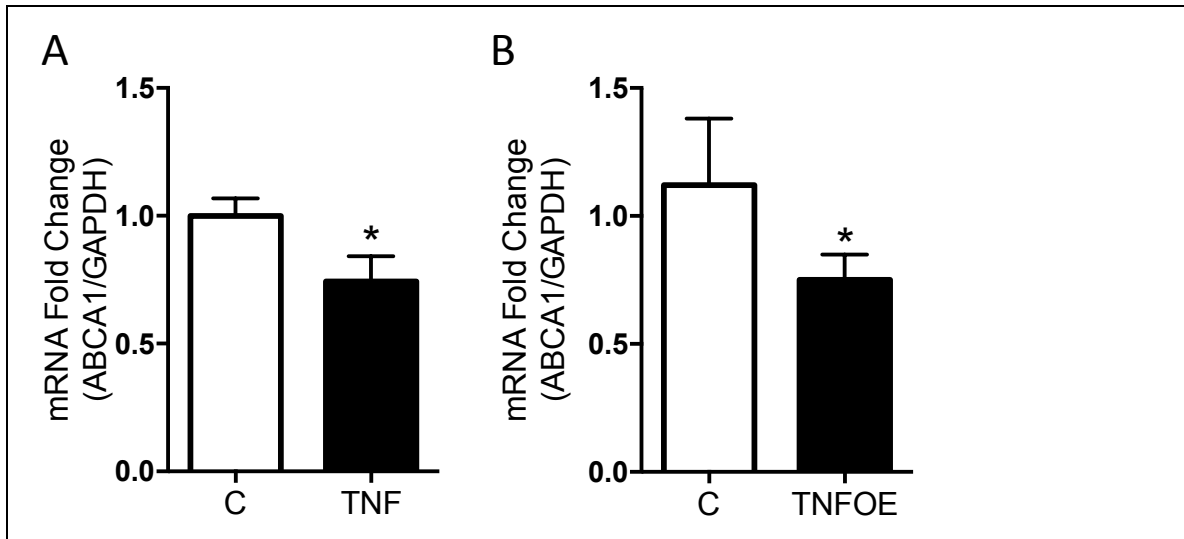

**Supplemental Figure 10. TNF treatment or TNF overexpression reduces ABCA1 expression.** **A.** Quantitative RT-PCR analysis of ABCA1 expression in normal human podocytes exposed to TNF (n=3) shows reduced ABCA1 expression when compared to untreated podocytes (C). Two-tailed Student's t-test,  $*P<0.05$ . **B.** Quantitative RT-PCR analysis of ABCA1 expression in TNF overexpressing podocytes compared to empty vector controls (C). Two-tailed Student's t-test,  $*P<0.05$ .

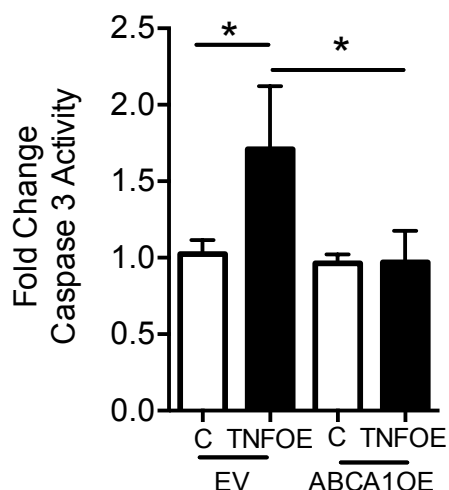

**Supplemental Figure 11. ABCA1 overexpression prevents TNF overexpression mediated caspase 3 activity. A.** TNFOE increases cleaved caspase 3 activity in empty vector (EV) containing podocytes compared to empty vector virus treated controls (C) \* $P < 0.05$ . TNFOE does not increase cleaved caspase 3 activity in ABCA1 overexpressing podocytes (ABCA1OE) ( $n=3$ ). One-way ANOVA, # $P < 0.05$ . need to change this

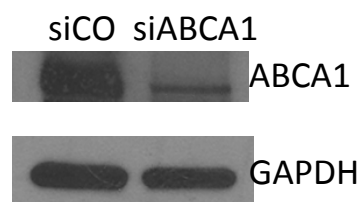

**Supplemental Figure 12. Stable podocyte cell line demonstrating knockdown of ABCA1.** Western blot of ABCA1 knock down (siABCA1) podocytes demonstrating reduced ABCA1 protein expression compared to scrambled controls (siCO) ( $n=3$ ).

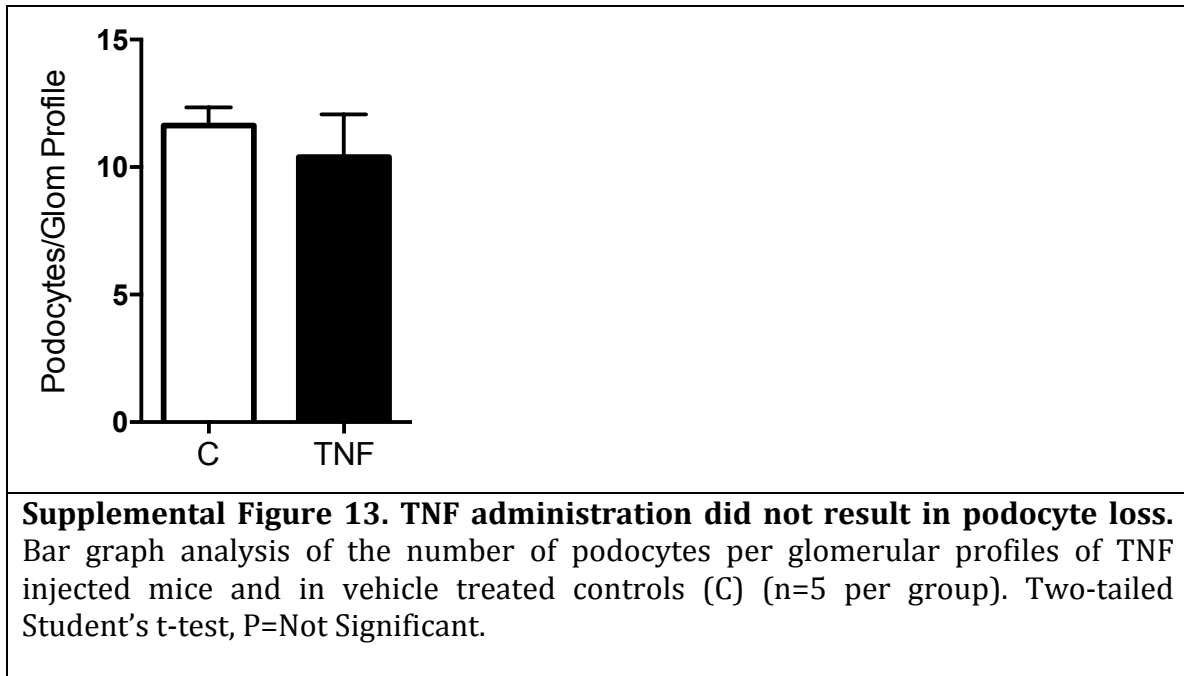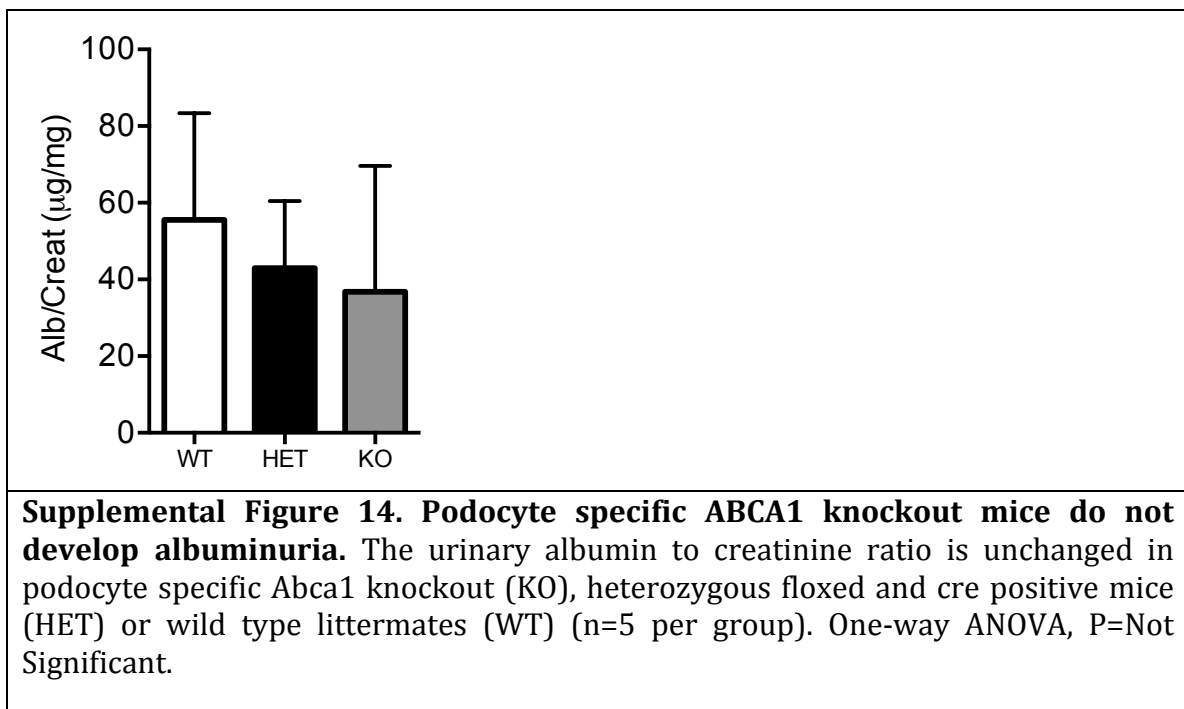

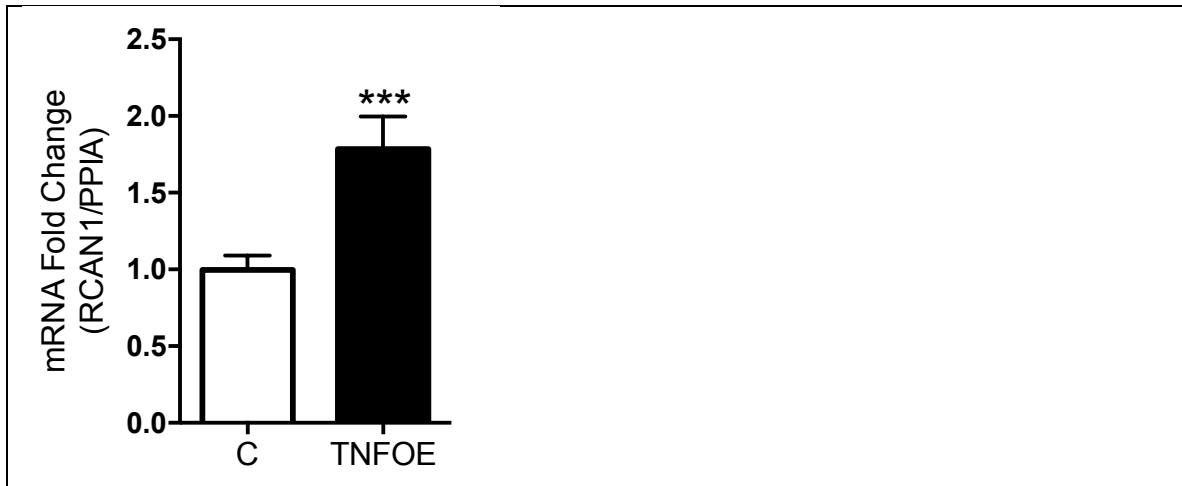

**Supplemental Figure 15. TNF overexpression increases RCAN1 expression. A.** Quantitative RT-PCR analysis of RCAN1 expression in TNF overexpressing podocytes (TNFOE) compared to empty vector control (C). Two-tailed Student's t-test, \*\*\*P<0.001.

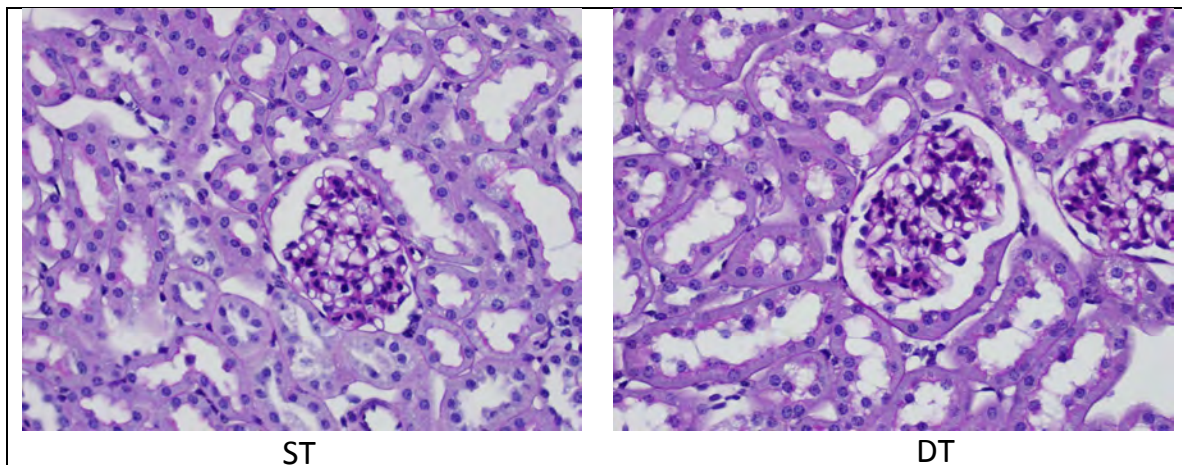

**Supplemental Figure 16. Podocyte specific constitutively active NFAT expressing mice do not develop lesions by light microscopy analysis after 4 days.** Representative H&E staining reveals no changes in glomerular structure in double transgenic mice (DT) compared to single transgenic (ST) mice fed doxycycline for 4 days (n=5 mice per group).

|                     |              |
|---------------------|--------------|
|                     | NS<br>(n=14) |
| Age                 | 10±5         |
| Sex                 | M/F (10/4)   |
| Serum Creatinine    | 0.5±0.2      |
| Proteinuria (g/24h) | 7.4±20       |
| eGFR                | 135±25       |

**Supplemental Table 1. Clinical characteristics of patients with nephrotic syndrome.** Age, gender, serum creatinine, proteinuria and eGFR of patients with nephrotic syndrome.
